# Supplementary material for: Taking the pulse of nature – how robotics and sensors assist in lake and reservoir management
Source: Copernicus journal article supplement (doi:10.5194/gi-14-167-2025), 2025-07-31
Supplement: Supplementary file 1 [file gi-14-167-2025-supplement.pdf]

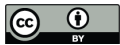

*Supplement of*

## **Taking the pulse of nature – how robotics and sensors assist in lake and reservoir management**

**Sebastian Zug et al.**

*Correspondence to:* Sebastian Zug ([sebastian.zug@informatik.tu-freiberg.de](mailto:sebastian.zug@informatik.tu-freiberg.de)) and Jörg Matschullat ([matschul@tu-freiberg.de](mailto:matschul@tu-freiberg.de))

The copyright of individual parts of the supplement might differ from the article licence.

Two supplementary figures were made to assist readers with easy access to related information from our project, 1) a map showing the geographical position of the target lakes in Amazonas State, Brazil, and 2) a figure showing the response of continuous in-situ (on board) measurement results of the Vaisala CO<sub>2</sub> sensor versus the discontinuous, sample-based results from subsequent gas chromatography in the laboratory.

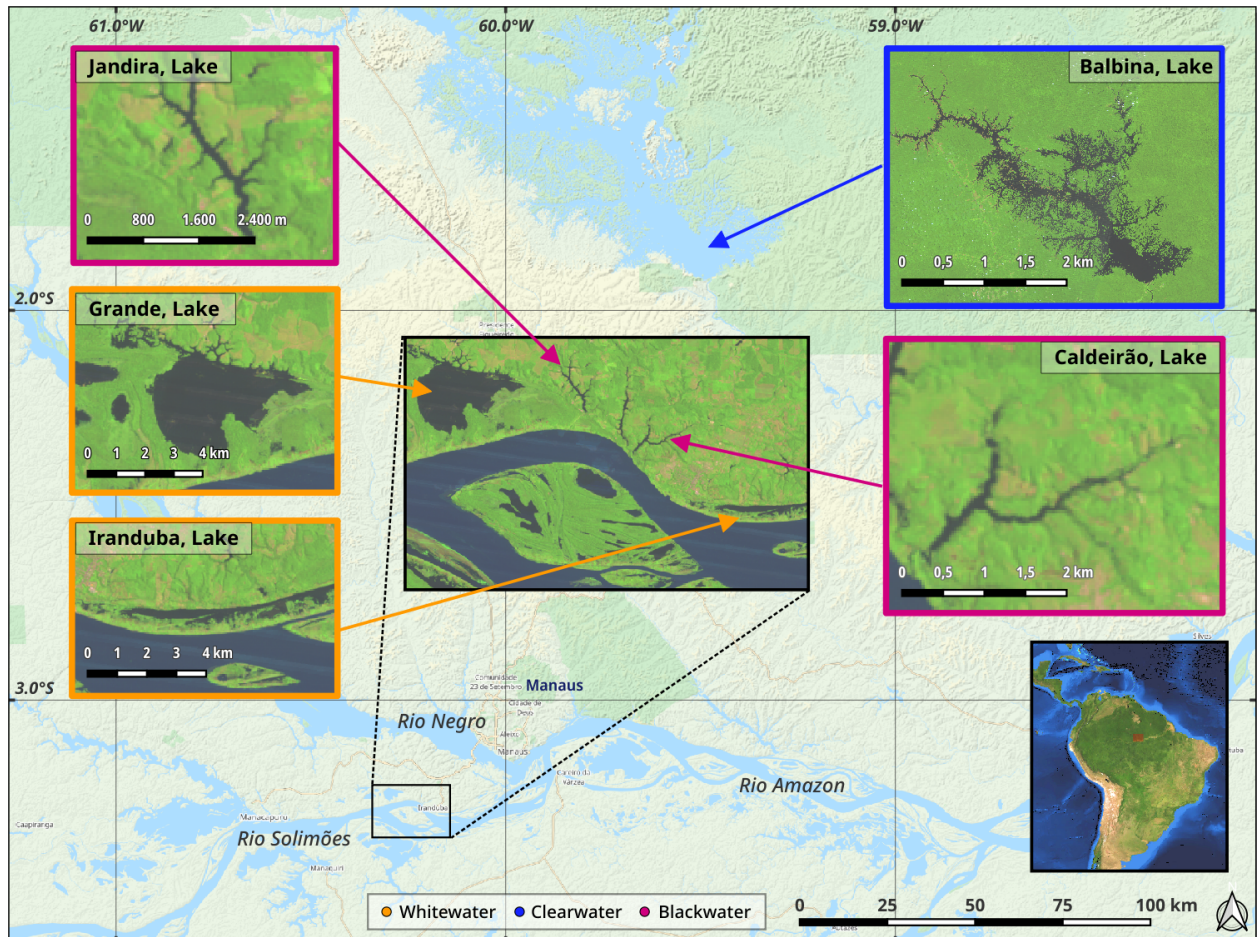

**Figure S1.** The target lakes and Balbina reservoir in Amazonas state, Brazil, are classified according to their water type (see legend). The two largest tributaries of the Amazon River are the Rio Negro (blackwater) and the Rio Solimões (whitewater)

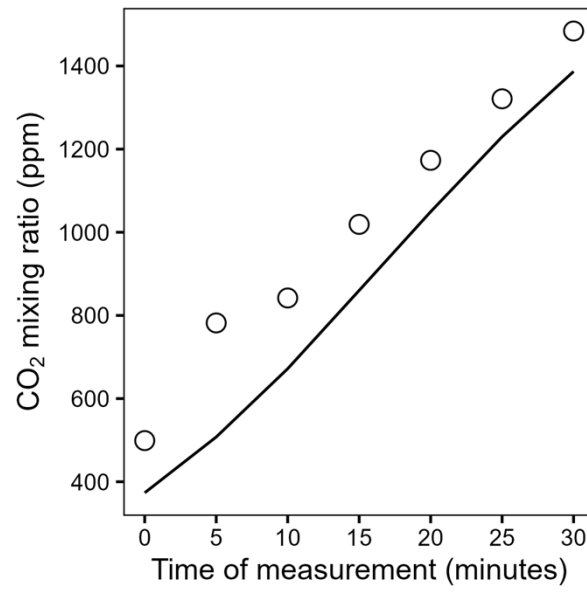

**Figure S2.** Comparison of continuous in-situ measurements (Vaisala sensor, solid line) with discontinuous gas sampling (gas chromatography, open circles) for an example CO<sub>2</sub> time series from Amazonas lakes
